# Supplementary material for: Fragrance compounds analysis of chrysanthemum
Source: Research Square preprint supplement (doi:10.21203/rs.3.rs-2559866/v1), 2023-02-09
Supplement: Supplementary file 1 [file c6b29b9fe62dd9c1172b456d.docx]

**Classification and analysis of chrysanthemum fragrance types**

**Supplementary Table 1** Statistics for volatile substances in chrysanthemum with different aroma types.

**Supplementary Table 2** Statistics for sensory evaluation of chrysanthemum flavor.

**Supplementary Table 1 Statistics of various volatile substances in Chrysanthemum with different aroma types**

| **Chrysanthemum cultivars** | **Aroma types** | **Terpenoids**  **(numbers)** | **Fatty acid derivatives**  **(numbers)** | **Phenylpropanoid/**  **benzenoid compounds**  **(numbers)** | **Others**  **(numbers)** |
| --- | --- | --- | --- | --- | --- |
| **Sigong** | **Chrysanthemum**  **fragrance** | **18** | **5** | **3** | **6** |
| **Chrysanthemum**  **indicum** | **Artemisa fragrance** | **32** | **13** | **2** | **5** |
| **Qihuang** | **Medicinal fragrance** | **25** | **8** | **3** | **2** |
| **Quehuan** | **Sweet fragrance** | **20** | **17** | **5** | **4** |
| **Bairuixiang** | **Perfume fragrance** | **23** | **14** | **4** | **5** |
| **Xiaokuixiang** | **Fruity fragrance** | **23** | **19** | **2** | **10** |

**Supplementary Table 2 Statistical table of sensory evaluation of chrysanthemum flavor**

| **Offsprings** | **Fruity fragrance（%）** | **Non-fruity fragrance**  **（%）** |
| --- | --- | --- |
| **S-SP-129** | **92.3** | **0.0** |
| **S-SP-143** | **92.3** | **0.0** |
| **S-SP-218** | **92.3** | **0.0** |
| **S-SP-76** | **91.7** | **0.0** |
| **S-CP-206** | **91.7** | **0.0** |
| **S-CP-244** | **88.9** | **0.0** |
| **S-CP-353** | **87.5** | **0.0** |
| **S-CP-53** | **87.5** | **0.0** |
